# Supplementary material
Source: MDPI journal article supplement (https://www.mdpi.com/2218-0532/90/2/32)

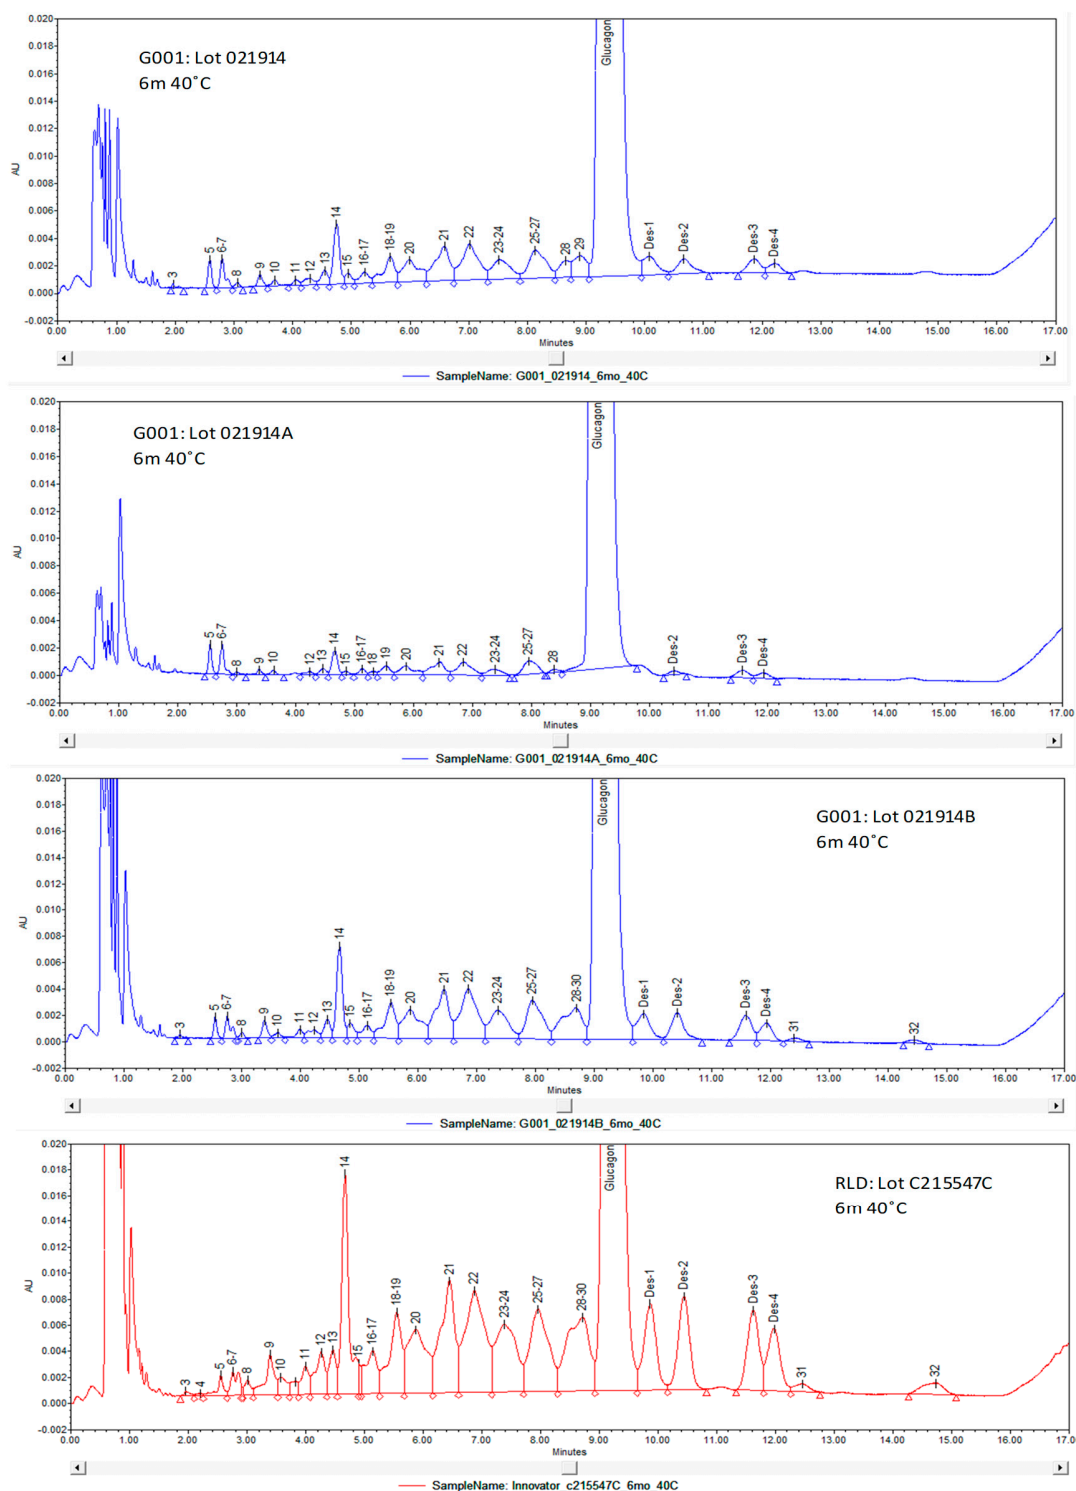

Figures S4: Glucagon Impurity Profile by UPLC at 6 Months, 40°C. G001 = AMP-glucagon; RLD = ELI-glucagon

Supplement: s1 [file s1]

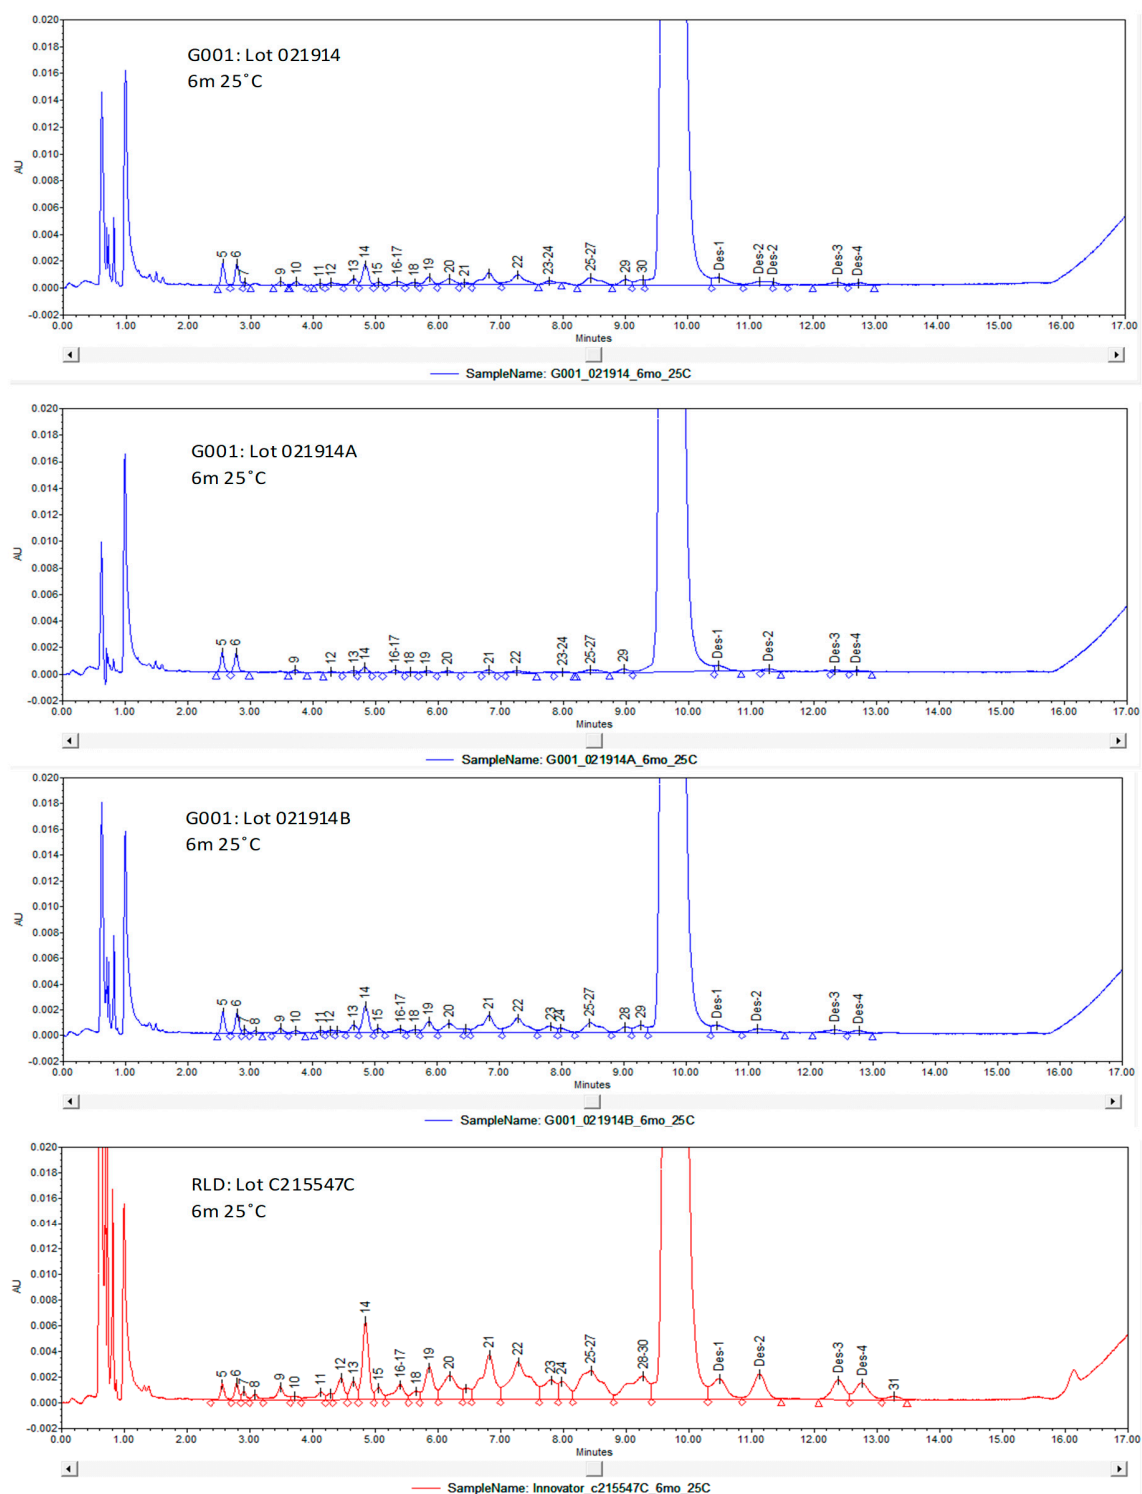

Figures S2: Glucagon Impurity Profile by UPLC at 6 Months, 25°C. G001 = AMP-glucagon; RLD = ELI-glucagon

Supplement: s1 [file s1]

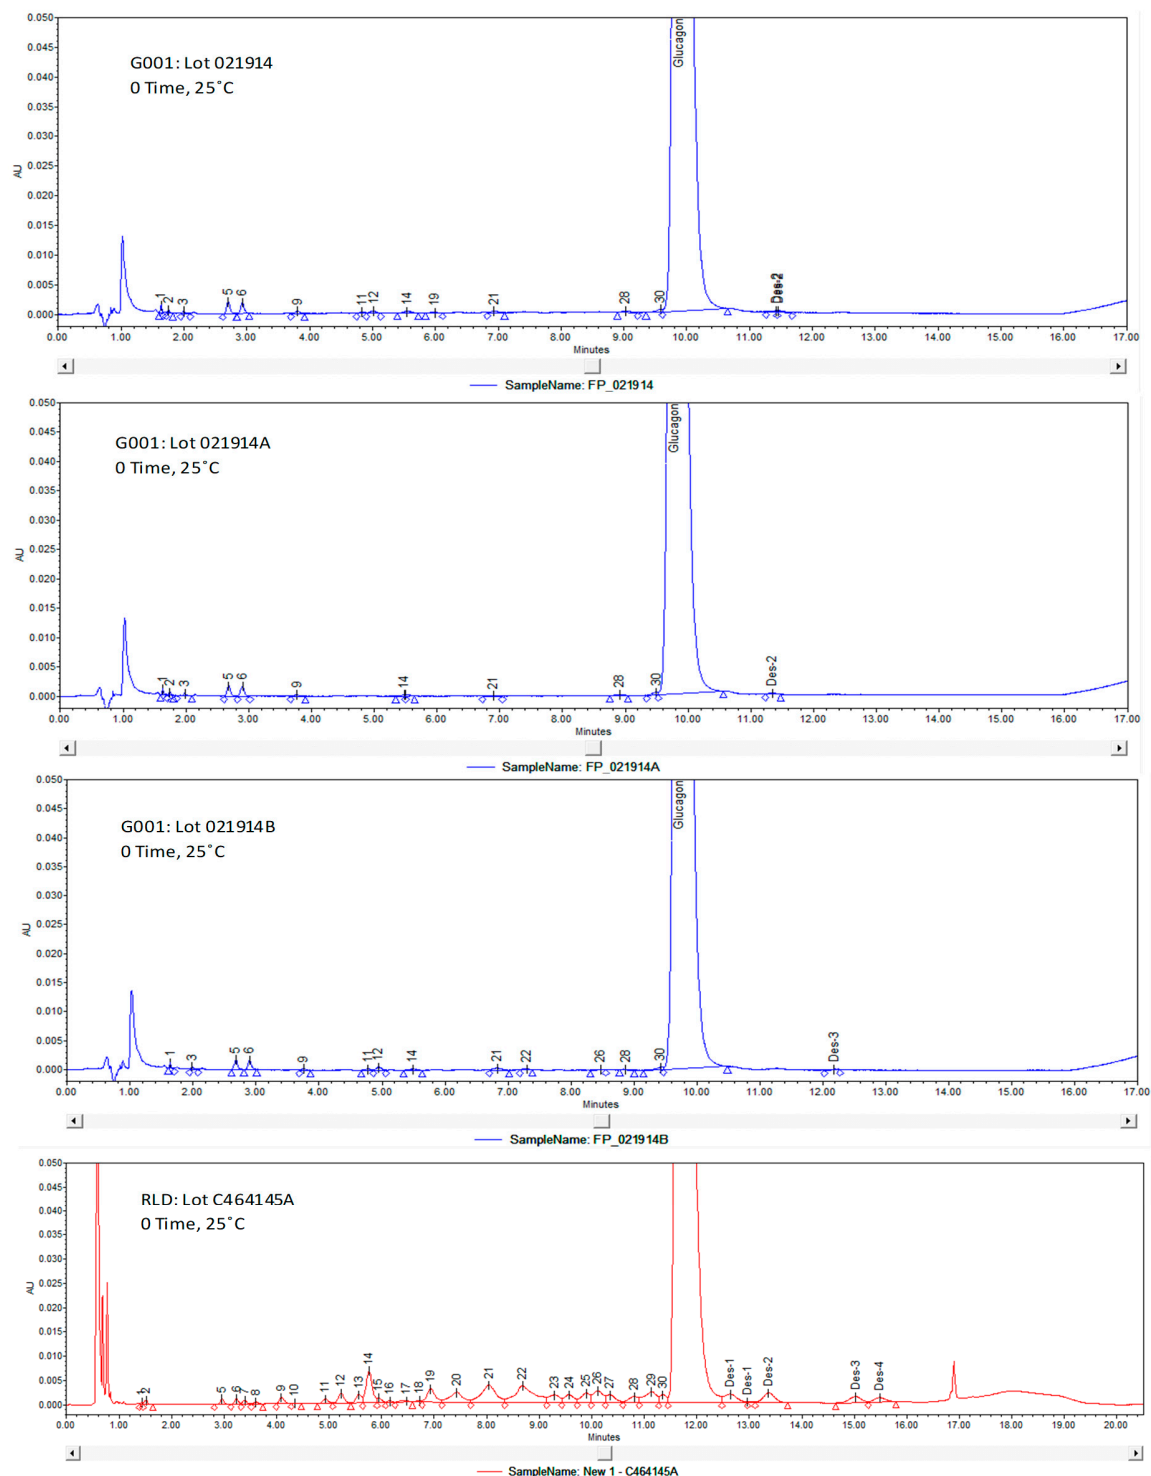

Figures S1: Glucagon Impurity Profile by UPLC at Zero Time, G001 = AMP-glucagon; RLD = ELI-glucagon

Supplement: s1 [file s1]
